# Supplementary material for: Integrating Nano-DAP and Inductive cum Targeted-Yield Equations to Improve Maize Productivity and Nutrient Use Efficiency in Alfisols of Karnataka
Source: Research Square preprint supplement (doi:10.21203/rs.3.rs-7684059/v1), 2025-12-29
Supplement: Supplementary file 1 [file dd3dae13acdcbff22e551395.docx]

**Supplementary Table S1. Basic parameters for targeted yield equations of maize under NPK alone and NPK+FYM approach*.***

| **Parameters** | **NPK alone** | | | **NPK + FYM** | | |
| --- | --- | --- | --- | --- | --- | --- |
| **N** | **P** | **K** | **N** | **P** | **K** |
| **NR (kg q-1)** | 1.20 | 0.48 | 1.68 | 1.28 | 0.52 | 1.77 |
| **CS%** | 9.36 | 19.49 | 29.66 | 9.36 | 19.49 | 29.66 |
| **CF%** | 39.98 | 61.95 | 189.49 | 52.49 | 72.50 | 204.25 |
| **CNF%** | 3595.63 | 4842.09 | - | 3596.36 | 4842.45 | - |
| **COM%** | - | - | - | 0.73 | 0.36 | 1.41 |

**Supplementary Table S2. Influence of different approaches of nutrient application on kernel yield and stover yield of maize.**

| **Treatment details** | | **LFS** | | **MFS** | | **HFS** | |
| --- | --- | --- | --- | --- | --- | --- | --- |
| **Kernel  yield  (q ha–1)** | **Stover  yield  (q ha–1)** | **Kernel yield  (q ha–1)** | **Stover  yield  (q ha–1)** | **Kernel  yield (q ha–1)** | **Stover  yield  (q ha–1)** |
| **T1** | STCR NPK Targeted Yield  100 q ha–1 | 94.91 | 134.77 | 95.87 | 138.24 | 96.80 | 141.33 |
| **T2** | STCR NPK + FYM Targeted Yield 100 q ha–1 | 97.09 | 137.87 | 98.05 | 141.38 | 98.98 | 144.51 |
| **T3** | STCR NPK Targeted Yield  90 q ha–1 | 85.31 | 121.14 | 86.27 | 124.40 | 87.20 | 127.32 |
| **T4** | STCR NPK + FYM Targeted  Yield 90 q ha–1 | 90.00 | 127.80 | 90.96 | 131.16 | 91.89 | 134.16 |
| **T5** | General Recommended dose | 82.32 | 116.90 | 83.30 | 120.12 | 84.24 | 122.99 |
| **T6** | Soil Fertility Rating Approach | 83.79 | 118.98 | 84.77 | 122.23 | 85.70 | 125.12 |
| **T7** | Absolute control | 47.91 | 68.04 | 49.18 | 70.92 | 50.11 | 73.17 |
| **S.Em. ±** | | **4.06** | **5.77** | **4.11** | **5.92** | **4.15** | **6.06** |
| **C.D. @ 5 %** | | **11.57** | **16.43** | **11.70** | **16.87** | **11.82** | **17.26** |

**Supplementary Figure S1. Meteorological data of the main test crop experimental site during *Rabi* 2023 at ZARS, GKVK, Bengaluru**
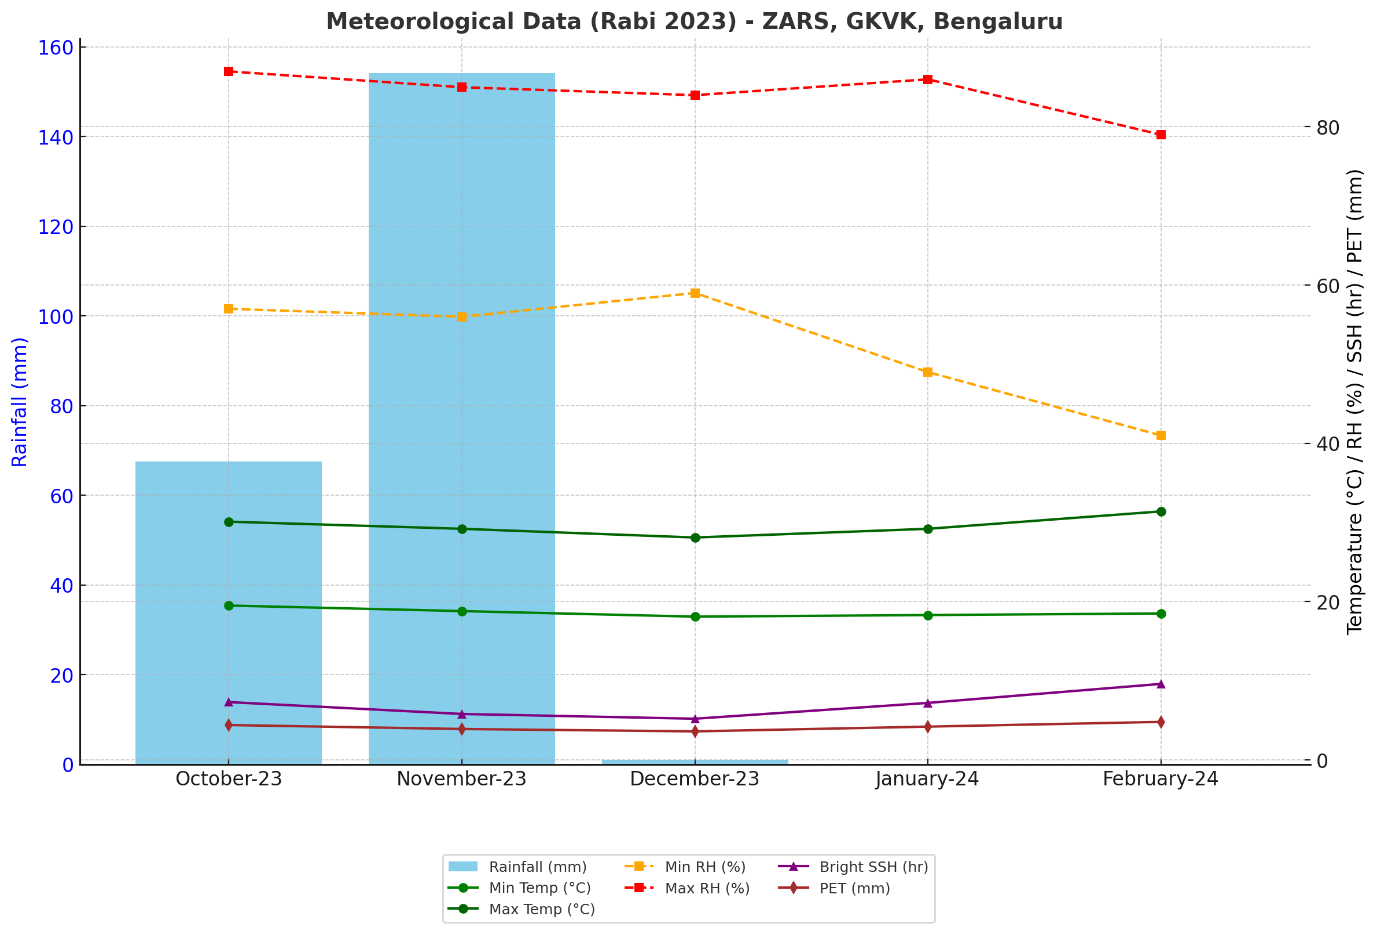
**.**


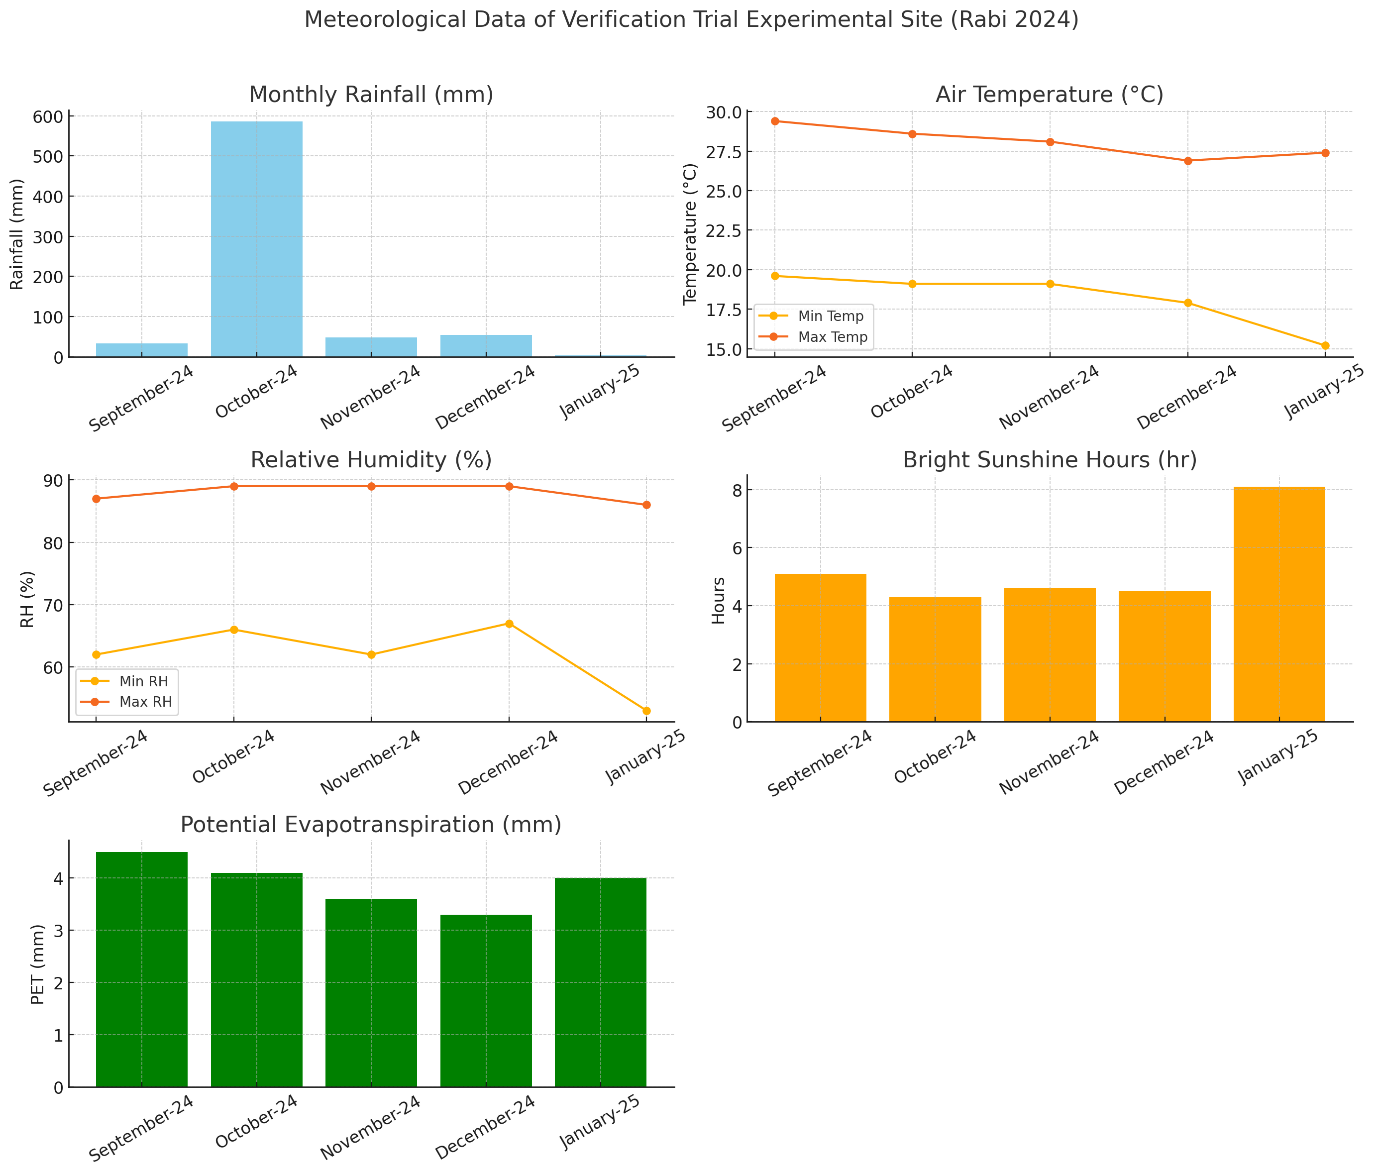


**Supplementary Figure S2. Meteorological data of the verification trial experimental site during *Rabi* 2024 at ZARS, GKVK, Bengaluru.**

**R3 R2 R1**

|  | **T4** |  | **T3** |  | **T5** |  |
| --- | --- | --- | --- | --- | --- | --- |
| **T7** | **T4** | **T1** |
| **T3** | **T1** | **T7** |
| **T1** | **T6** | **T2**  Water channel (0.5mt) |
|  | | | | |
| **T5** |  | **T2** |  | **T6** |
| **T6** | **T7** | **T3** |
| **T2** | **T5** | **T4** |

**Note: Same layout followed for MFS and HFS**

**Treatments**

T1 = STCR NPK TY 10 t ha–1

T2 = STCR NPK + FYM TY 10 t ha–1

T3 = STCR NPK TY 9 t ha–1

T4 = STCR NPK + FYM TY 9 t ha–1

T5 = General Recommended dose

T6 = Soil Fertility Rating Approach

T7 = Absolute Control

Bund (0.3 mt)

**N**

Main Bund (0.75 mt)

**Supplementary Figure S3. Layout plan of the verification trial**

**
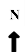
 L3 strip L2 strip L1 strip**

10 m

80 m

| **Bulk** | | | | **Bulk** | | | | **Bulk** | | | |
| --- | --- | --- | --- | --- | --- | --- | --- | --- | --- | --- | --- |
| **Water channel (0.4 m)** | | | | **Water channel (0.4 m)** | | | | **Water channel (0.4 m)** | | | |
|  | 81 | Nano | F0 |  | 28 | Nano | F1 |  | 27 | Nano | F2 |
| 80 | 2-0-2 | 29 | 2-2-3 |  | 26 | 2-2-0 |
| 79 | 3-3-2 | 30 | 0-0-0 | 25 | 2-1-2 |
| 78 | 3-3-3 | 31 | 0-2-2 | 24 | 2-2-2 |
| 77 | 3-2-1 | 32 | 2-1-1 | 23 | 2-3-2 |
| 76 | 2-3-3 | 33 | 2-2-1 | 22 | 0-0-0 |
| 75 | 3-2-3 | 34 | 1-2-1 | 21 | 3-2-2 |
| 74 | 1-1-2 | 35 | 3-1-1 | 20 | 3-3-1 |
| 73 | 0-0-0 | 36 | 1-1-1 | 19 | 1-2-2 |
| **Water channel (0.4 m)** | | | | **Water channel (0.4 m)** | | | | **Water channel (0.4 m)** | | | |
|  | 72 | 2-1-1 | F2 | Water channel (0.4m) | 37 | 2-2-0 | F0 | Water channel (0.4m) | 18 | 3-3-3 | F1 |
| 71 | 2-2-1 | 38 | 3-3-1 | 17 | 3-3-2 |
| 70 | 1-2-1 | 39 | 2-2-2 | 16 | 0-0-0 |
| 69 | 0-0-0 | 40 | 1-2-2 | 15 | 2-3-3 |
| 68 | 0-2-2 | 41 | 3-2-2 | 14 | 2-0-2 |
| 67 | 1-1-1 | 42 | 2-3-2 | 13 | 1-1-2 |
| 66 | 2-2-3 | 43 | 2-1-2 | 12 | 3-2-1 |
| 65 | 3-1-1 | 44 | 0-0-0 | 11 | 3-2-3 |
| 64 | Nano |  | 45 | Nano |  | 10 | Nano |
| **Water channel (0.4 m)** | | | | **Water channel (0.4 m)** | | | | **Water channel (0.4 m)** | | | |
|  | 63 | Nano | F1 |  | 46 | Nano | F2 |  | 9 | Nano | F0 |
| 62 | 1-2-2 |  | 47 | 3-3-2 |  | 8 | 2-2-1 |
| 61 | 2-1-2 | 48 | 0-0-0 | 7 | 1-2-1 |
| 60 | 3-3-1 | 49 | 2-3-3 | 6 | 1-1-1 |
| 59 | 2-3-2 | 50 | 1-1-2 | 5 | 2-1-1 |
| 58 | 2-2-0 | 51 | 3-3-3 | 4 | 0-0-0 |
| 57 | 3-2-2 | 52 | 3-2-3 | 3 | 0-2-2 |
| 56 | 0-0-0 | 53 | 2-0-2 | 2 | 2-2-3 |
| 55 | 2-2-2 | 54 | 3-2-1 | 1 | 3-1-1 |
| **Water channel (0.4m)** | | | | **Water channel (0.4m)** | | | | **Water channel (0.4m)** | | | |
| **Bulk (3.0 m)** | | | | **Bulk (3.0 m)** | | | | **Bulk (3.0 m)** | | | |

**Supplementary Figure S4: Layout plan of main test crop experiment on maize.**

N: P: K (Kg ha–1) applied at 3 levels

After harvest of crop soil samples were collected and analyzed for available N, P and K

Fodder maize (African tall) is grown as test crop and harvested after 60 days

| **I strip** | **II strip** | **III strip** |
| --- | --- | --- |
| 0-0-0  (N1-P1-K1) | 150-135-200  (N2-P2-K2) | 300-270-400  (N3-P3-K3) |

**Supplementary Figure S5:** **Layout and details of fertility gradient experiment of fodder maize crop.**
